# Supplementary material
Source: Springer Nature journal article supplement (https://www.springermedizin.de/resource/supplementary/12885_2013_4450_MOESM8_ESM.pdf/9466408)
Supplement: MOESM8 [file 9466408]

-2.5

1:1

2.5

P13 P26 P31 P30 P71 P57 P59 P10 P68 P50 P70 P51 P60 P15 P20 P24 P49 P16 P62 P44 P47 P38 P58 P27 P61 P45 P19 P52 P72 P54 P48 P36 P11 P56 P69 P18 P78 P88 P85 P92 P83 P95 P75 P73 P81 P82 P67 P84 P86 P90 P93 P22 P55 P23 P65 P25 P33 P12 P39 P63 P74 P76 P79 P8 P28 P32 P77 P87 P91 P66 P94 P89 P96

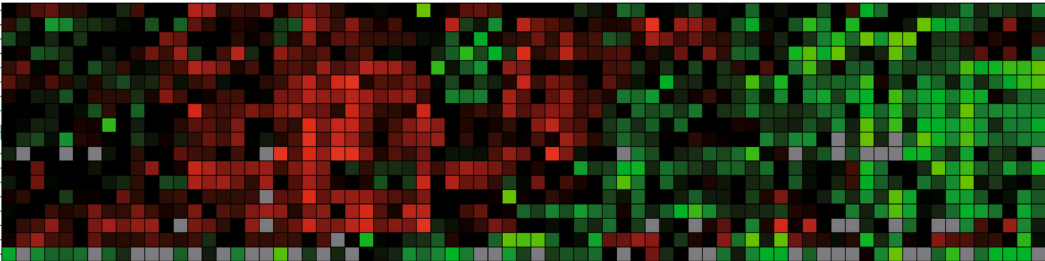

Cluster 1

Cluster 2

IFITM1  
SOCS1  
IFNG  
CD45  
FOXP3  
IRF1  
CXCL9  
STAT1  
CXCL10  
CXCL11  
PDL1  
MX1  
IFIT1  
PDL2  
CD68  
CD163  
MUC1  
PD1
